# Supplementary material for: Adherence of Healthcare Workers to Saudi Management Guidelines of Heat-Related Illnesses during Hajj Pilgrimage
Source: Int J Environ Res Public Health. 2021 Jan 28;18(3):1156. doi: 10.3390/ijerph18031156 (PMC7908601; doi:10.3390/ijerph18031156)
Supplement: Supplementary file 1 [file ijerph-18-01156-s001.pdf]

## Heat Related-Illnesses Clinical Audit in Hajj 1440H - Cross-sectional study

### Data collection tool

|          |                                                                                             |
|----------|---------------------------------------------------------------------------------------------|
| Label #: | Date of collection: DD / MM / 2019<br>Name of data collector:<br>Name of Facility:<br>Time: |
|----------|---------------------------------------------------------------------------------------------|

#### Section (1): Demographics الديموغرافيات

|                                                                                                                                                |                                      |
|------------------------------------------------------------------------------------------------------------------------------------------------|--------------------------------------|
| 1.1 Gender الجنس : <input type="checkbox"/> Male ذكر <input type="checkbox"/> Female أنثى                                                      | 1.4 Nationality: الجنسية _____       |
| 1.2 Age العمر : _____ years                                                                                                                    | 1.5 Country of origin: المنشأ: _____ |
| 1.3 Residence of pilgrim إقامة الحاج:<br><input type="checkbox"/> Within KSA داخل المملكة<br><input type="checkbox"/> Outside KSA خارج المملكة | 1.6 Hospital MRN: الرقم الطبي: _____ |

#### Section (2): Admission Details معلومات الدخول

|                                                                                                                                                    |                                                                                                                                                                         |
|----------------------------------------------------------------------------------------------------------------------------------------------------|-------------------------------------------------------------------------------------------------------------------------------------------------------------------------|
| 2.1 Patient presented at إلى: قدم إلى:<br><input type="checkbox"/> Emergency الطوارئ <input type="checkbox"/> Out-patient clinic العيادات الخارجية | 2.2 Date of arrival to hospital: التاريخ القدوم للمستشفى: DD / MM / 2019<br>Time الوقت: ____: ____ <input type="checkbox"/> AM صباحاً <input type="checkbox"/> PM مساءً |
| 2.3 Admitted التتويم: <input type="checkbox"/> Yes <input type="checkbox"/> No                                                                     | 2.4 Admission <input type="checkbox"/> Ward جناح _____<br>التنويم <input type="checkbox"/> ICU العناية المركزة _____                                                    |
| 2.5 Date of admission التاريخ الدخول: DD / MM / 2019                                                                                               | 2.6 Date of discharge تاريخ الخروج: DD / MM / 2019                                                                                                                      |

#### Section (3) Management of suspected Heat Exhaustion إدارة حالات الاجهاد الحراري المشتبهة

|                                                                                                                                                                         |                                                                                                                                                                                                                   |
|-------------------------------------------------------------------------------------------------------------------------------------------------------------------------|-------------------------------------------------------------------------------------------------------------------------------------------------------------------------------------------------------------------|
| 3.1 Patient moved to a cooler place<br>تم نقل المريض لمكان أبرد <input type="checkbox"/> Yes <input type="checkbox"/> No                                                | 3.3 Patient clothes lightened up<br>تم تخفيف ملابس المريض <input type="checkbox"/> Yes <input type="checkbox"/> No                                                                                                |
| 3.2 Patient placed in supine position and<br>elevate legs and hips رفع ووضع المريض على ظهره و<br>ساقية و وركيه <input type="checkbox"/> Yes <input type="checkbox"/> No | 3.4 Patient started oral hydration<br>بدأ ترطيب المريض عن طريق الفم <input type="checkbox"/> Yes <input type="checkbox"/> No                                                                                      |
| 3.5 Patient had NAUSEA المريض يشتكي من الغثيان <input type="checkbox"/> Yes <input type="checkbox"/> No                                                                 | 3.5a If YES, Intravenous fluid given<br>إذا نعم، تم إعطاء المريض محلول عن طريق الوريد <input type="checkbox"/> Yes <input type="checkbox"/> No                                                                    |
| 3.7 Patient developed: بدء ظهور: <input type="checkbox"/> Yes <input type="checkbox"/> No                                                                               | 3.8 If YES نعم إذا: <input type="checkbox"/> Yes <input type="checkbox"/> No                                                                                                                                      |
| 3.7a. neurologic symptoms أعراض عصبية <input type="checkbox"/> Yes <input type="checkbox"/> No                                                                          | 3.8a. Cooling started تبريد <input type="checkbox"/> Yes <input type="checkbox"/> No                                                                                                                              |
| 3.7b. increased body temperature ارتفاع درجة حرارة الجسم <input type="checkbox"/> Yes <input type="checkbox"/> No                                                       | 3.8b. Transferred quickly to a health facility (hospital) with a heatstroke<br>تم نقل المريض فوراً إلى منشأة صحية (مستشفى) لديها وحدة علاج ضربات الحرارة <input type="checkbox"/> Yes <input type="checkbox"/> No |
| 3.7c. sustained hypotension انخفاض مستمر في ضغط الدم <input type="checkbox"/> Yes <input type="checkbox"/> No                                                           | 3.10 If No, other diagnoses considered (refer to registry criteria below) <input type="checkbox"/> Yes <input type="checkbox"/> No                                                                                |
| 3.9 Signs and symptoms of heat exhaustion didn't improve لم تتحسن أعراض الاجهاد الحراري <input type="checkbox"/> Yes <input type="checkbox"/> No                        | إذا لا، هل تم اعتبار تشخيص مختلف                                                                                                                                                                                  |

#### Section (4) Management of SUSPECTED HEATSTROKE (Prehospital settings)

إدارة حالات ضربات الحرارة المشتبهة - (قبل دخول المستشفى)

|                                                                                                                                    |
|------------------------------------------------------------------------------------------------------------------------------------|
| 4.1 BSI* considered تم تطبيق معايير الصحة الوقائية للتعامل مع سوائل الجسم <input type="checkbox"/> Yes <input type="checkbox"/> No |
|------------------------------------------------------------------------------------------------------------------------------------|

\*Body substance isolation is a system of infection precautions intended to reduce nosocomial transmission of infectious agents among patients (a practice of isolating all body substances (blood, urine, feces, tears, etc))

Heat Related-Illnesses Clinical Audit in Hajj 1440H - Cross-sectional study  
Data collection tool

|          |                                                                                             |
|----------|---------------------------------------------------------------------------------------------|
| Label #: | Date of collection: DD / MM / 2019<br>Name of data collector:<br>Name of Facility:<br>Time: |
|----------|---------------------------------------------------------------------------------------------|

|                                                                                                                                                                                                                                                                                                                                      |                                                                                                                      |                                                                                                                                                                  |                                                          |
|--------------------------------------------------------------------------------------------------------------------------------------------------------------------------------------------------------------------------------------------------------------------------------------------------------------------------------------|----------------------------------------------------------------------------------------------------------------------|------------------------------------------------------------------------------------------------------------------------------------------------------------------|----------------------------------------------------------|
| 4.2 Any medications given prehospital تم إعطاء أي أدوية قبل وصول المستشفى                                                                                                                                                                                                                                                            | <input type="checkbox"/> Yes <input type="checkbox"/> No                                                             | 4.3 Full prehospital report taken (e.g. if IVF was given, documented temperature...) تم أخذ تقرير كامل عن الحالة (إعطاء محاليل، المؤشرات الحيوية)                | <input type="checkbox"/> Yes <input type="checkbox"/> No |
| <b>4.4 Recognition of heat stroke signs</b> تشخيص ضربة الحرارة وفقاً للعلامات                                                                                                                                                                                                                                                        |                                                                                                                      |                                                                                                                                                                  |                                                          |
| 4.4a Exposure to extreme environmental heat التعرض لحرارة جو شديدة                                                                                                                                                                                                                                                                   | <input type="checkbox"/> Yes <input type="checkbox"/> No                                                             | 4.4b Mental Status alteration تغيرات في الحالة العقلية                                                                                                           | <input type="checkbox"/> Yes <input type="checkbox"/> No |
| 4.4c Core Body temperature > 40°C درجة حرارة الجسم المركزية > 40                                                                                                                                                                                                                                                                     | <input type="checkbox"/> Yes <input type="checkbox"/> No                                                             | 4.4d Other differential diagnosis considered تم اعتبار تشخيص مختلف                                                                                               | <input type="checkbox"/> Yes <input type="checkbox"/> No |
| 4.8 REMOVED from heat and lightened up clothes تم نقلة من مكان الحرارة وتخفيف الملابس                                                                                                                                                                                                                                                |                                                                                                                      | <input type="checkbox"/> Yes <input type="checkbox"/> No                                                                                                         |                                                          |
| 4.9 Responsiveness (AVPU*) assessed تقييم حالة الوعي والاستجابة<br>*AVPU scale (an acronym from "alert, verbal, pain, unresponsive")                                                                                                                                                                                                 | <input type="checkbox"/> Yes <input type="checkbox"/> No                                                             | 4.10 All Vital signs documented (TEMP, HR, SO2, GLUCOSE, BP) تم تسجيل وكتابة المؤشرات الحيوية                                                                    | <input type="checkbox"/> Yes <input type="checkbox"/> No |
| <b>4.11 STABILIZE (ABCs)</b> استقرار مجرى الهواء والتنفس والدورة الدموية:                                                                                                                                                                                                                                                            |                                                                                                                      |                                                                                                                                                                  |                                                          |
| 4.11a. AIRWAY stabilized تم استقرار وفتح مجرى الهواء                                                                                                                                                                                                                                                                                 | <input type="checkbox"/> Yes <input type="checkbox"/> No                                                             | 4.11b. BREATHING stabilized administer oxygen to keep SaO2 >94% تم استقرار التنفس (نسبة الاوكسجين > 94%)                                                         | <input type="checkbox"/> Yes <input type="checkbox"/> No |
| 4.11c. CIRCULATION stabilized تم استقرار الدورة الدموية<br>- Normal saline 500 ml given مل ٥٠٠ ملحي<br>- Patient is still hypotensive (expand blood volume and manage hypotension) and more fluids given (500 ml Normal Saline) مازال المريض يعاني من انخفاض ضغط الدم (تم إعطائه المزيد من المحاليل + ٥٠٠ مل) (500 ml Normal Saline) | <input type="checkbox"/> Yes <input type="checkbox"/> No<br><input type="checkbox"/> Yes <input type="checkbox"/> No | <input type="checkbox"/> Yes <input type="checkbox"/> No<br><input type="checkbox"/> Yes <input type="checkbox"/> No                                             |                                                          |
| <b>4.12 COOLING</b> التبريد:                                                                                                                                                                                                                                                                                                         |                                                                                                                      |                                                                                                                                                                  |                                                          |
| 4.12a. Started immediately on scene تم التبريد فوراً في الموقع                                                                                                                                                                                                                                                                       | <input type="checkbox"/> Yes <input type="checkbox"/> No                                                             | 4.12b. Ice packs/chemical ice packs, fanning, wet sheets to the skin were applied تم التبريد باستخدام عبوات ثلج/عبوات ثلج كيميائية، تهوية، شراشف مبللة على الجلد | <input type="checkbox"/> Yes <input type="checkbox"/> No |
| 4.12c. Cooling continued on the way to heatstroke unit تم استمرار عملية تبريد في الطريق الى وحدة ضربات الحرارة                                                                                                                                                                                                                       | <input type="checkbox"/> Yes <input type="checkbox"/> No                                                             | 4.12d. Patient transferred immediately to heatstroke unit تم نقل المريض فوراً لوحدة ضربات الحرارة                                                                | <input type="checkbox"/> Yes <input type="checkbox"/> No |
| <b>Section (5) Management of Suspected Heatstroke</b><br>(In-hospital settings: In the heatstroke unit) إدارة ضربات الحرارة المشتبهة (داخل المستشفى - وحدة ضربات الحرارة)                                                                                                                                                            |                                                                                                                      |                                                                                                                                                                  |                                                          |
| 5.1 Adhered to appropriate PPEs تم تطبيق إجراءات الصحة الوقائية اللازمة و وضع معدات الحماية الشخصية اللازمة                                                                                                                                                                                                                          | <input type="checkbox"/> Yes <input type="checkbox"/> No                                                             | 5.2 Antipyretics given تم إعطاء خافض للحرارة                                                                                                                     | <input type="checkbox"/> Yes <input type="checkbox"/> No |
| 5.3 Full prehospital report taken (e.g. if IVF was given, documented temperature...) تم أخذ التقرير الكامل قبل وصول المريض للمستشفى                                                                                                                                                                                                  |                                                                                                                      | <input type="checkbox"/> Yes <input type="checkbox"/> No                                                                                                         |                                                          |
| 5.4 Diagnosis confirmed with rectal thermometer calibrated to measure high temperatures to >42°C تم تأكيد التشخيص عن طريق قياس الحرارة بميزان حرارة شرجي                                                                                                                                                                             | <input type="checkbox"/> Yes <input type="checkbox"/> No                                                             | 5.5 Mental Status alteration تغيرات في الحالة العقلية                                                                                                            | <input type="checkbox"/> Yes <input type="checkbox"/> No |

Heat Related-Illnesses Clinical Audit in Hajj 1440H - Cross-sectional study  
Data collection tool

|          |                                                                                             |
|----------|---------------------------------------------------------------------------------------------|
| Label #: | Date of collection: DD / MM / 2019<br>Name of data collector:<br>Name of Facility:<br>Time: |
|----------|---------------------------------------------------------------------------------------------|

|                                                                                                                                                                      |                                                          |                                                                                                                                                             |                                                          |
|----------------------------------------------------------------------------------------------------------------------------------------------------------------------|----------------------------------------------------------|-------------------------------------------------------------------------------------------------------------------------------------------------------------|----------------------------------------------------------|
| <b>5.6 COOLING: التبريد</b>                                                                                                                                          |                                                          |                                                                                                                                                             |                                                          |
| 5.6a. Cooling <b>continued</b> استمر التبريد                                                                                                                         | <input type="checkbox"/> Yes <input type="checkbox"/> No | 5.6b. Skin and rectal temperature was continuously <b>monitored</b> or every 10 minutes استمرار قياس الحرارة الجلد وميزان الحرارة الشرجي او كل ١٠ دقائق     | <input type="checkbox"/> Yes <input type="checkbox"/> No |
| 5.6c. Skin temperature <b>maintained &gt;30°C</b> الحفاظ درجة حرارة الجلد > ٣٠                                                                                       | <input type="checkbox"/> Yes <input type="checkbox"/> No | 5.6c. Cooling <b>stopped</b> when rectal temperature is <b>39°C</b> تم التوقف عن التبريد عند وصول الحرارة الشرجية ٣٩                                        | <input type="checkbox"/> Yes <input type="checkbox"/> No |
| 5.7 <b>Responsiveness (AVPU*)</b> assessed and documented<br>تقييم وتسجيل حالة الوعي والاستجابة<br>*AVPU scale (an acronym from "alert, verbal, pain, unresponsive") | <input type="checkbox"/> Yes <input type="checkbox"/> No | 5.8 All Vital signs documented (TEMPERATURE, HR, SpO2, GLUCOSE, BP)<br>تسجيل وكتابة جميع المؤشرات الحيوية                                                   | <input type="checkbox"/> Yes <input type="checkbox"/> No |
| <b>5.9 STABILIZE (ABCs): استقرار مجرى الهواء والتنفس والدورة الدموية</b>                                                                                             |                                                          |                                                                                                                                                             |                                                          |
| 5.9a. <b>AIRWAY stabilize</b> : تم استقرار وفتح مجرى الهواء<br>Patient intubated تم وضع أنبوب تنفسي                                                                  | <input type="checkbox"/> Yes <input type="checkbox"/> No | 5.9b. <b>BREATHING stabilized</b><br>administer oxygen to <b>keep SaO2 &gt;94</b><br>تم استقرار التنفس (نسبة الاوكسجين > ٩٤%)                               | <input type="checkbox"/> Yes <input type="checkbox"/> No |
| <b>5.10 Other considerations: اعتبارات أخرى:</b>                                                                                                                     |                                                          |                                                                                                                                                             |                                                          |
| 5.10a. <b>Rhabdomyolysis diagnosed:</b> تم تشخيص انحلال الربيدات (العضلات)                                                                                           |                                                          | <input type="checkbox"/> Yes <input type="checkbox"/> No                                                                                                    |                                                          |
| 5.10a1. Volume expanded by giving more fluids تم إعطاء محاليل بالوريد                                                                                                | <input type="checkbox"/> Yes <input type="checkbox"/> No | 5.10a2. Intravenous <b>furosemide, mannitol and sodium bicarbonate</b> was given تم إعطاء ادوية مثل فروسامايد و مانيتول و بيكربونات الصوديوم عن طريق الوريد | <input type="checkbox"/> Yes <input type="checkbox"/> No |
| 5.10a3. Potassium and calcium was <b>monitored</b> مراقبة مستويات البوتاسيوم والكالسيوم بالدم                                                                        | <input type="checkbox"/> Yes <input type="checkbox"/> No | 5.10a4. If hyperkalemia; <b>treated</b> في حال وجود انخفاض في مستوى البوتاسيوم بالدم، هل تم علاجه؟                                                          | <input type="checkbox"/> Yes <input type="checkbox"/> No |
| 5.10b. <b>Seizure/shivering</b> :التشنجات/الرعاش                                                                                                                     |                                                          | <input type="checkbox"/> Yes <input type="checkbox"/> No                                                                                                    |                                                          |
| 5.10b1. Benzodiazepines given (ادوية للتشنج) تم إعطاء بينزوديازيبين                                                                                                  |                                                          | <input type="checkbox"/> Yes <input type="checkbox"/> No                                                                                                    |                                                          |
| <b>5.11 Post cooling</b> بعد التبريد                                                                                                                                 |                                                          |                                                                                                                                                             |                                                          |
| - Multiple organ system dysfunction ضرر في وظائف أعضاء متعددة بالجسم                                                                                                 |                                                          | <input type="checkbox"/> Yes <input type="checkbox"/> No                                                                                                    |                                                          |
| - Supportive therapy given تم إعطاء علاج دعم                                                                                                                         |                                                          | <input type="checkbox"/> Yes <input type="checkbox"/> No                                                                                                    |                                                          |
